# Supplementary material
Source: PubMed Central journal article supplement (PMC5425681)
Supplement: 12551_2009_15_MOESM1_ESM.pdf [file 12551_2009_15_MOESM1_ESM.pdf]

## References

Altelaar AF, Taban IM, McDonnell LA, Verhaert PDEM, de Lange RP, Adan RAH, Mooi WJ, Heeren RM, Piersma SR (2007) High-resolution MALDI imaging mass spectrometry allows localization of peptide distributions at cellular length scales in pituitary tissue sections *Int J Mass Spectrom* 260: 293-211 doi: 10.1016/j.ijms.2006.09.028

Atkinson SJ, Loadman PM, Sutton C, Patterson LH, Clench MR (2007) Examination of the distribution of the bioreductive drug AQ4N and its active metabolite AQ4 in solid tumours by imaging matrix-assisted laser desorption/ionisation mass spectrometry. *Rapid Commun Mass Spectrom* 21: 1271-1276 doi: 10.1002/rcm.2952

Aveldano MI (1988) Phospholipid species containing long and very long polyenoic fatty acids remain with rhodopsin after hexane extraction of photoreceptor membranes. *Biochemistry* 27: 1229-1239 doi: 10.1021/bi00404a024

\*Caprioli RM, Farmer TB, Gile J (1997) Molecular imaging of biological samples: localization of peptides and proteins using MALDI-TOF MS. *Anal Chem* 69: 4751-4760 doi: 10.1021/ac970888i

*The first report that addressed imaging mass spectrometry of peptides and proteins.*

Chaurand P, Stoeckli M, Caprioli RM (1999) Direct profiling of proteins in biological tissue sections by MALDI mass spectrometry. *Anal Chem* 71: 5263-5270 doi: 10.1021/ac990781q

\*Chaurand P, Schwartz SA, Billheimer D, Xu BJ, Crecelius A, Caprioli RM (2004) Integrating histology and imaging mass spectrometry. *Anal Chem* 76: 1145-1155 doi: 10.1021/ac0351264

*Authors developed a commonly used method using indium–tin oxide (ITO) coated*

*conductive glass slides which allow MALDI mass spectrometry and an optic image on the same section.*

Chaurand P, Norris JL, Cornett DS, Mobley JA, Caprioli RM (2006) New developments in profiling and imaging of proteins from tissue sections by MALDI mass spectrometry. *J Proteome Res* 5: 2889-2900 doi: 10.1021/pr060346u

Cornett DS, Mobley JA, Dias EC, Andersson M, Arteaga CL, Sanders ME, Caprioli RM (2006) A novel histology-directed strategy for MALDI-MS tissue profiling that improves throughput and cellular specificity in human breast cancer. *Mol Cell Proteomics* 5: 1975-1983 doi: M600119-MCP200

Denkert C, Budczies J, Kind T, Weichert W, Tablack P, Sehouli J, Niesporek S, Konsgen D, Dietel M, Fiehn O (2006) Mass spectrometry-based metabolic profiling reveals different metabolite patterns in invasive ovarian carcinomas and ovarian borderline tumors. *Cancer Res* 66: 10795-10804 doi: 66/22/10795

Ford DA, Monda JK, Brush RS, Anderson RE, Richards MJ, Fliesler SJ (2008) Lipidomic analysis of the retina in a rat model of Smith-Lemli-Opitz syndrome: alterations in docosahexaenoic acid content of phospholipid molecular species. *J Neurochem* 105: 1032-1047 doi: JNC5203

Garrett TJ, Prieto-Conaway MC, Kovtoun V, Bui H, Izgarian N, Stafford G, Yost RA (2006) Imaging of small molecules in tissue sections with a new intermediate-pressure MALDI linear ion trap mass spectrometer. *Int J Mass Spectrom* 260: 166-176 doi: 10.1016/j.ijms.2006.09.019

\*Goto-Inoue N, Hayasaka T, Sugiura Y, Taki T, Li YT, Matsumoto M, Setou M (2008) High-sensitivity analysis of glycosphingolipids by matrix-assisted laser desorption/ionization quadrupole ion trap time-of-flight imaging mass spectrometry on transfer membranes. *J Chromatogr B Analyt Technol Biomed Life Sci* 870: 74-83 doi: S1570-0232(08)00395-4

*Authors succeeded in highly sensitive detection and detail structural analysis of glycosphingolipids by thin-layer chromatography (TLC) folowed by IMS (TLC-IMS).*

Hannun YA, Bell RM (1989) Functions of sphingolipids and sphingolipid breakdown products in cellular regulation. Science 243: 500-507 doi: 10.1126/science.2643164

Hatanaka T, Hatanaka Y, Tsuchida J, Ganapathy V, Setou M (2006) Amino acid transporter ATA2 is stored at the trans-Golgi network and released by insulin stimulus in adipocytes. J Biol Chem 281: 39273-39284 doi: M604534200

\*\*Hayasaka T, Goto-Inoue N, Sugiura Y, Zaima N, Nakanishi H, Ohishi K, Nakanishi S, Naito T, Taguchi R, Setou M (2008) Matrix-assisted laser desorption/ionization quadrupole ion trap time-of-flight (MALDI-QIT-TOF)-based imaging mass spectrometry reveals a layered distribution of phospholipid molecular species in the mouse retina. Rapid Commun Mass Spectrom 22: 3415-3426 doi: 10.1002/rcm.3751

*Authors succeeded to visualize the layer-specific distribution of phospholipids that have different fatty acids in the mouse reitna by MALDI-QIT-TOF-based imaging mass spectrometry*

Ikegami K, Heier RL, Taruishi M, Takagi H, Mukai M, Shimma S, Taira S, Hatanaka K, Morone N, Yao I, Campbell PK, Yuasa S, Janke C, Macgregor GR, Setou M (2007) Loss of alpha-tubulin polyglutamylation in ROSA22 mice is associated with abnormal targeting of KIF1A and modulated synaptic function. Proc Natl Acad Sci U S A 104: 3213-3218 doi: 10.1073/pnas.0611547104

Ikegami K, Horigome D, Mukai M, Livnat I, MacGregor GR, Setou M (2008) TTL10 is a protein polyglycylase that can modify nucleosome assembly protein 1. FEBS Lett 582: 1129-1134 doi: S0014-5793(08)00202-0

- Ikegami K, Setou M (2009) TTL10 can perform tubulin glycylation when co-expressed with TTL8. FEBS Lett 583: 1957-1963 doi: 10.1016/j.febslet.2009.05.003
- Jackson SN, Ugarov M, Egan T, Post JD, Langlais D, Albert Schultz J, Woods AS (2007) MALDI-ion mobility-TOFMS imaging of lipids in rat brain tissue. J Mass Spectrom 42: 1093-1098 doi: 10.1002/jms.1245
- Jackson SN, Wang HY, Woods AS (2005) Direct profiling of lipid distribution in brain tissue using MALDI-TOFMS. Anal Chem 77: 4523-4527 doi: 10.1021/ac050276v
- Kahyo T, Mostoslavsky R, Goto M, Setou M (2008) Sirtuin-mediated deacetylation pathway stabilizes Werner syndrome protein. FEBS Lett 582: 2479-2483 doi: S0014-5793(08)00542-5
- \*Karas M, Hillenkamp F (1988) Laser desorption ionization of proteins with molecular masses exceeding 10,000 daltons. Anal Chem 60: 2299-2301 doi: 10.1021/ac00171a028  
*The first memorial report of MALDI-MS which is commonly used for imaging mass spectrometry.*
- Khatib-Shahidi S, Andersson M, Herman JL, Gillespie TA, Caprioli RM (2006) Direct molecular analysis of whole-body animal tissue sections by imaging MALDI mass spectrometry. Anal Chem 78: 6448-6456 doi: 10.1021/ac060788p
- Konishi Y, Setou M (2009) Tubulin tyrosination navigates the kinesin-1 motor domain to axons. Nat Neurosci 12:559-567 doi: nn.2314
- Lapolla A, Ragazzi E, Andretta B, Fedele D, Tubaro M, Seraglia R, Molin L, Traldi P (2007) Multivariate analysis of matrix-assisted laser desorption/ionization mass spectrometric data related to glycoxidation products of human globins in nephropathic patients. J Am Soc Mass Spectrom 18: 1018-1023 doi:

S1044-0305(07)00140-7

McCombie G, Staab D, Stoeckli M, Knochenmuss R (2005) Spatial and spectral correlations in MALDI mass spectrometry images by clustering and multivariate analysis. *Anal Chem* 77: 6118-6124 doi: 10.1021/ac051081q

Pan HZ, Zhang H, Chang D, Li H, Sui H (2008) The change of oxidative stress products in diabetes mellitus and diabetic retinopathy. *Br J Ophthalmol* 92: 548-551 doi: 92/4/548

Puolitaival SM, Burnum KE, Cornett DS, Caprioli RM (2008) Solvent-free matrix dry-coating for MALDI imaging of phospholipids. *J Am Soc Mass Spectrom* 19: 882-886 doi: S1044-0305(08)00119-0

Schwartz SA, Weil RJ, Thompson RC, Shyr Y, Moore JH, Toms SA, Johnson MD, Caprioli RM (2005) Proteomic-based prognosis of brain tumor patients using direct-tissue matrix-assisted laser desorption ionization mass spectrometry. *Cancer Res* 65: 7674-7681 doi: 65/17/7674

Setou M, Matsumoto M, Hosokawa N, Sugiura Y, Hayasaka T (2008a) Development of mass microscopy. *Microscope* 43: 24-28

Setou M, Hayasaka T, Shimma S, Sugiura Y, Matsumoto M (2008b) Protein denaturation improves enzymatic digestion efficiency for direct tissue analysis using mass spectrometry. *Appl Surf Sci* 255: 1555-1559 doi:10.1016/j.apsusc.2008.05.120

Shimma S, Furuta M, Ichimura K, Yoshida Y, Setou M (2006a) A novel approach to in situ proteome analysis using chemical inkjet printing technology and MALDI-QIT-TOF tandem mass spectrometer. *J Mass Spectrom Soc Jpn* 54: 133-140

Shimma S, Furuta M, Ichimura K, Yoshida Y, Setou M (2006b) Direct MS/MS analysis

in mammalian tissue sections using MALDI-QIT-TOFMS and chemical inkjet technology. *Surf Int Anal* 38: 1712-1714 doi: 10.1002/sia.2389

Shimma S, Setou M (2007) Mass microscopy to reveal distinct localization of Heme B (m/z 616) in colon cancer liver metastasis. *J Mass Spectrom Soc Jpn* 55: 230-238

Shimma S, Sugiura Y, Hayasaka T, Hoshikawa Y, Noda T, Setou M (2007) MALDI-based imaging mass spectrometry revealed abnormal distribution of phospholipids in colon cancer liver metastasis. *J Chromatogr B Analyt Technol Biomed Life Sci* 855: 98-103 doi: 10.1016/j.jchromb.2007.02.037

Shimma S, Sugiura Y, Hayasaka T, Zaima N, Matsumoto M, Setou M (2008) Mass imaging and identification of biomolecules with MALDI-QIT-TOF-based system. *Anal Chem* 80: 878-885 doi: 10.1021/ac071301v

Skold K, Svensson M, Nilsson A, Zhang X, Nydahl K, Caprioli RM, Svenningsson P, Andren PE (2006) Decreased striatal levels of PEP-19 following MPTP lesion in the mouse. *J Proteome Res* 5: 262-269 doi: 10.1021/pr050281f

Stoeckli M, Chaurand P, Hallahan DE, Caprioli RM (2001) Imaging mass spectrometry: a new technology for the analysis of protein expression in mammalian tissues. *Nat Med* 7: 493-496 doi: 10.1038/86573

Stoeckli M, Staab D, Schweitzer A (2006) Compound and metabolite distribution measured by MALDI mass spectrometric imaging in whole body tissue sections. *Int J Mass Spectrom* 260: 195-202 doi: 10.1016/j.ijms.2006.10.007

Stoeckli M, Staab D, Staufenbiel M, Wiederhold KH, Signor L (2002) Molecular imaging of amyloid beta peptides in mouse brain sections using mass spectrometry. *Anal Biochem* 311: 33-39 doi: 10.1016/S0003-2697(02)00386-X

Sugiura Y, Konishi Y, Zaima N, Kajihara S, Nakanishi H, Taguchi R, Setou M (2009) Visualization of the cell-selective distribution of PUFA-containing

phosphatidylcholines in mouse brain by imaging mass spectrometry. *J Lipid Res* (in press)

\*\*Sugiura Y, Shimma S, Konishi Y, Yamada MK, Setou M (2008) Imaging mass spectrometry technology and application on ganglioside study; visualization of age-dependent accumulation of C20-ganglioside molecular species in the mouse hippocampus. *PLoS ONE* 3: e3232 doi: 10.1371/journal.pone.0003232

*Authors describe the spatical distribution of C20-ganglioside molecular species in the mouse hippocampus and their age-dependent accumulation by IMS.*

Sugiura Y, Shimma S, Setou M (2006a) Thin sectioning improves the peak intensity and signal-to-noise ratio in direct tissue mass spectrometry. *J Mass Spectrom Soc Jpn* 54: 45-48

Sugiura Y, Shimma S, Setou M (2006b) Two-step matrix application technique to improve ionization efficiency for matrix-assisted laser desorption/ionization in imaging mass spectrometry. *Anal Chem* 78: 8227-8235 doi: 10.1021/ac060974v

Suzuki M, Kamei M, Itabe H, Yoneda K, Bando H, Kume N, Tano Y (2007) Oxidized phospholipids in the macula increase with age and in eyes with age-related macular degeneration. *Mol Vis* 13: 772-778 doi: v13/a84

Taira S, Sugiura Y, Moritake S, Shimma S, Ichiyanagi Y, Setou M (2008) Nanoparticle-assisted laser desorption/ionization based mass imaging with cellular resolution. *Anal Chem* 80: 4761-4766 doi: 10.1021/ac800081z

\*Yao I, Sugiura Y, Matsumoto M, Setou M (2008) In situ proteomics with imaging mass spectrometry and principal component analysis in the Scrapper-knockout mouse brain. *Proteomics* 8: 3692-3701 doi: 10.1002/pmic.200701121

*Authors compared wild type and Scrapper-knock-out mice by in situ proteomics with imaging mass spectrometry and PCA and found find numerous alterations in the KO mouse brain. Their results indicated that IMS is a powerful tool to perform in situ proteomics.*

Yao I, Takagi H, Ageta H, Kahyo T, Sato S, Hatanaka K, Fukuda Y, Chiba T, Morone N, Yuasa S, Inokuchi K, Ohtsuka T, Macgregor GR, Tanaka K, Setou M (2007) SCRAPPER-dependent ubiquitination of active zone protein RIM1 regulates synaptic vesicle release. *Cell* 130: 943-957 doi: S0092-8674(07)00902-6

Zaima N, Hayasaka T, Goto-Inoue N, Setou M (2009a) Imaging of metabolites by MALDI mass spectrometry. *J Oleo Sci* 58:415-419

Zaima N, Matsuyama Y, Setou M (2009b) Principal component analysis of direct matrix-assisted laser desorption/ionization mass spectrometric data related to metabolites of fatty liver. *J Oleo Sci* 58: 267-273
